# Supplementary material for: Cost-Effectiveness of Bivalent, Quadrivalent, and Nonavalent HPV Vaccination in South Africa
Source: PubMed Central journal article supplement — Clin Drug Investig. 2022 Mar 16;42(4):333–43. doi: 10.1007/s40261-022-01138-6 (PMC8989937; doi:10.1007/s40261-022-01138-6), 2022-03-16
Supplement: 40261_2022_1138_MOESM1_ESM.pdf [file 40261_2022_1138_MOESM1_ESM.pdf]

## Supplementary Online Content

### *Clinical Drug Investigation*

Cost-effectiveness of bivalent, quadrivalent, and nonavalent HPV vaccination in South Africa.

Michaeli DT, Stoycheva S, Marcus SM, Zhang W, Michaeli JC, Michaeli T

- Table e1** Vaccination cost estimation for two doses of the bivalent, quadrivalent, and nonavalent HPV vaccine
- Table e2** Booster shot cost estimation for bivalent, quadrivalent, and nonavalent HPV vaccination
- Table e3** Bivalent, quadrivalent, and nonavalent HPV vaccine efficacy for high-risk and low-risk infections
- Table e4** Willingness-to-pay threshold estimation in South Africa
- Table e5** Univariate sensitivity analysis
- Table e6** Input variables' alpha and beta parameters
- Table e7** ICER results under different parameter distributions
- Table e8** Cost-effectiveness results for the alternative Markov model structure
- 
- Figure e1** Alternative Markov model structure
- Figure e2** Tornado plot for nonavalent compared to bivalent vaccination

This supplementary material has been provided by the authors to give readers additional information about their work.

|                                  | <b>Bivalent<br/>(Cervarix®)</b> | <b>Quadrivalent<br/>(Gardasil®)</b> | <b>Nonavalent<br/>(Gardasil9®)</b> | <b>% per Dose</b> |
|----------------------------------|---------------------------------|-------------------------------------|------------------------------------|-------------------|
| Cost per dose                    | 54.30                           | 67.87                               | 1,523.79                           |                   |
| Waste                            | 2.71                            | 3.39                                | 76.19                              | 5%                |
| Transportation and handling      | 5.43                            | 6.79                                | 152.38                             | 10%               |
| Distribution                     | 8.14                            | 10.18                               | 228.57                             | 15%               |
| Promotion and communication      | 1.36                            | 1.70                                | 38.09                              | 2.5%              |
| Planning, monitoring, management | 5.43                            | 6.79                                | 152.38                             | 10%               |
| <b>Total cost (two doses)</b>    | <b>139.82</b>                   | <b>174.78</b>                       | <b>3,923.75</b>                    |                   |

**Table e1** Vaccination cost estimation for two doses of the bivalent, quadrivalent, and nonavalent HPV vaccine

Vaccination costs were estimated from the perspective of the South African Department of Health based on guidelines issued by the World Health Organization (WHO) and previous studies [1–3]. Costs are displayed in 2019 R. HPV: human papillomavirus; R: South African Rand.

|                                  | <b>Bivalent<br/>(Cervarix®)</b> | <b>Quadrivalent<br/>(Gardasil®)</b> | <b>Nonavalent<br/>(Gardasil9®)</b> | <b>% per Dose</b> |
|----------------------------------|---------------------------------|-------------------------------------|------------------------------------|-------------------|
| Cost per dose                    | 54.30                           | 67.87                               | 1523.79                            |                   |
| Waste                            | 2.71                            | 3.39                                | 76.19                              | 5%                |
| Transportation and handling      | 5.43                            | 6.79                                | 152.38                             | 10%               |
| Distribution                     | 8.14                            | 10.18                               | 228.57                             | 15%               |
| <b>Total cost (booster shot)</b> | <b>70.59</b>                    | <b>88.24</b>                        | <b>1,980.92</b>                    |                   |

**Table e2** Booster shot cost estimation for bivalent, quadrivalent, and nonavalent HPV vaccination

Vaccination costs were estimated from the perspective of the South African Department of Health based on guidelines issued by the World Health Organization (WHO) and previous studies [1–3]. Costs are displayed in 2019 R. HPV: human papillomavirus; R: South African Rand.

|                            | Prevalence | Efficacy      |               |               | References  |
|----------------------------|------------|---------------|---------------|---------------|-------------|
|                            |            | Bivalent      | Quadrivalent  | Nonavalent    |             |
| <b>HIGH-RISK INFECTION</b> |            |               |               |               |             |
| HPV types 16 and 18        | 40.60%     | 98.00%        | 98.00%        | 98.00%        | [4, 5, 5–8] |
| Other high-risk types      | 59.40%     | 30.20%        | 25.00%        | 97.00%        | [4, 9–11]   |
| <b>Overall</b>             |            | <b>57.73%</b> | <b>54.64%</b> | <b>97.41%</b> |             |
| <b>LOW-RISK INFECTION</b>  |            |               |               |               |             |
| HPV types 6 and 11         | 76.20%     | 0.00%         | 98.00%        | 98.00%        | [4, 5, 5–8] |
| Other low-risk types       | 23.80%     | 0.00%         | 0.00%         | 0.00%         | [4, 12]     |
| <b>Overall</b>             |            | <b>0.00%</b>  | <b>74.68%</b> | <b>74.68%</b> |             |

**Table e3** Bivalent, quadrivalent, and nonavalent HPV vaccine efficacy for high-risk and low-risk infections

The overall vaccine efficacy against high-risk / low-risk HPV is calculated by weighting the efficacy against HPV 16, 18 / HPV 6, 11 and the cross-protection efficacy against other high-risk / low-risk HPV types with the respective HPV types' prevalence in South Africa. Consequently, overall efficacy against high-risk infections were estimated at 57.73% for bivalent, 54.64% for quadrivalent, and 97.41% for nonavalent vaccination. Efficacy against low-risk infections were calculated 0% for bivalent and 74.68% for quadrivalent and nonavalent vaccination. HPV: human papillomavirus.

| <b>Willingness-To-Pay Threshold</b> | <b>Value</b>  | <b>References</b> |
|-------------------------------------|---------------|-------------------|
| Practical evidence (HIV case)       | 4,880         | [13]              |
| Based on GDP                        | 45,812        | [14]              |
| Economic model (opportunity cost)   | 20,196        | [15]              |
| <b>Average</b>                      | <b>23,630</b> |                   |

**Table e4** Willingness-to-pay threshold estimation in South Africa

Costs are displayed in 2019 R. GDP: gross domestic product; HIV: human immunodeficiency virus; R: South African Rand.

Cost-effectiveness of bivalent, quadrivalent, and nonavalent HPV vaccination

| Transition probabilities                      | Value  | 95% Confidence Interval |        | Bivalent vs. Quadrivalent |           | Bivalent vs. Nonavalent |           | Quadrivalent vs. Nonavalent |           |
|-----------------------------------------------|--------|-------------------------|--------|---------------------------|-----------|-------------------------|-----------|-----------------------------|-----------|
|                                               |        |                         |        | Lower CI                  | Higher CI | Lower CI                | Higher CI | Lower CI                    | Higher CI |
| from Healthy to HR Infection                  | 0.1320 | 0.1173                  | 0.1485 | -120,944                  | -112,072  | 15,204                  | 10,834    | 1,995                       | -1,379    |
| from Healthy to LR Infection                  | 0.0650 | 0.0548                  | 0.0761 | -116,694                  | -116,102  | 12,591                  | 13,468    | 163                         | 445       |
| from HR Infection to CIN I (9-34 years)       | 0.0878 | 0.0591                  | 0.1164 | -121,962                  | -112,161  | 16,806                  | 9,854     | 3,479                       | -2,356    |
| from HR Infection to CIN I (35-70 years)      | 0.0824 | 0.0298                  | 0.1351 | -124,852                  | -111,565  | 30,624                  | 2,136     | 16,625                      | -9,605    |
| from HR Infection to CIN II/III (9-34 years)  | 0.0070 | 0.0020                  | 0.0120 | -126,095                  | -108,816  | 17,780                  | 9,039     | 4,088                       | -2,843    |
| from HR Infection to CIN II/III (35-70 years) | 0.0287 | 0.0080                  | 0.0494 | -120,699                  | -113,712  | 43,044                  | -5,307    | 28,884                      | -16,706   |
| from LR Infection to Genital Warts            | 0.0297 | 0.0001                  | 0.0592 | -98,089                   | -141,630  | 13,725                  | 12,402    | 301                         | 295       |
| from LR Infection to Healthy                  | 0.4100 | 0.3100                  | 0.5100 | -115,908                  | -116,741  | 13,705                  | 12,546    | 521                         | 148       |
| from CIN I to CIN II/III (9-34 years)         | 0.0567 | 0.0159                  | 0.0975 | -125,631                  | -109,819  | 18,106                  | 9,146     | 4,406                       | -2,809    |
| from CIN I to CIN II/III (35-70 years)        | 0.2321 | 0.0726                  | 0.3916 | -117,621                  | -115,295  | 36,647                  | 1,390     | 22,846                      | -10,575   |
| from CIN I to Healthy                         | 0.4982 | 0.2079                  | 0.7884 | -107,278                  | -107,278  | -24,151                 | -24,151   | -33,462                     | -33,462   |
| from CIN II/III to Cervical Cancer            | 0.0480 | 0.0370                  | 0.0750 | -324,614                  | -324,614  | -33,314                 | -33,314   | -55,648                     | -55,648   |
| from CIN II/III to Healthy                    | 0.0370 | 0.0170                  | 0.0570 | -119,707                  | -119,707  | -9,396                  | -9,396    | -20,991                     | -20,991   |
| from Cervical Cancer to Healthy               | 0.1560 | 0.1250                  | 0.1870 | -72,593                   | -72,593   | 10,203                  | 10,203    | 1,036                       | 1,036     |
| from Cervical Cancer to Dead                  | 0.1060 | 0.0850                  | 0.1270 | -226,220                  | -226,220  | 18,306                  | 18,306    | -333                        | -333      |
| from Genital Warts to Healthy                 | 0.7140 | 0.5881                  | 0.8124 | -116,397                  | -116,397  | 13,013                  | 13,013    | 297                         | 297       |

  

| Utilities                                   | Value | 95% Confidence Interval |      | Bivalent vs. Quadrivalent |           | Bivalent vs. Nonavalent |           | Quadrivalent vs. Nonavalent |           |
|---------------------------------------------|-------|-------------------------|------|---------------------------|-----------|-------------------------|-----------|-----------------------------|-----------|
|                                             |       |                         |      | Lower CI                  | Higher CI | Lower CI                | Higher CI | Lower CI                    | Higher CI |
| QALYs associated with state HR Infection    | 1.00  | 0.80                    | 1.00 | -33,869                   | -116,397  | 4,910                   | 13,013    | 109                         | 297       |
| QALYs associated with state LR Infection    | 1.00  | 0.80                    | 1.00 | 10,131                    | -116,397  | 5,802                   | 13,013    | 333                         | 297       |
| QALYs associated with state CIN I           | 0.91  | 0.86                    | 0.96 | -108,847                  | -125,071  | 12,426                  | 13,659    | 283                         | 313       |
| QALYs associated with state CIN II/III      | 0.87  | 0.83                    | 0.91 | -102,657                  | -134,383  | 11,951                  | 14,283    | 272                         | 328       |
| QALYs associated with state Cervical Cancer | 0.56  | 0.48                    | 0.65 | -112,107                  | -121,633  | 12,691                  | 13,396    | 290                         | 307       |
| QALYs associated with state Genital Warts   | 0.82  | 0.80                    | 0.84 | -122,700                  | -111,749  | 12,947                  | 13,067    | 297                         | 297       |

  

| Direct Medical Costs (ZAR)                  | Value      | 95% Confidence Interval |            | Bivalent vs. Quadrivalent |           | Bivalent vs. Nonavalent |           | Quadrivalent vs. Nonavalent |           |
|---------------------------------------------|------------|-------------------------|------------|---------------------------|-----------|-------------------------|-----------|-----------------------------|-----------|
|                                             |            |                         |            | Lower CI                  | Higher CI | Lower CI                | Higher CI | Lower CI                    | Higher CI |
| Costs associated with state CIN I           | 1,385.66   | 1,108.53                | 1,662.79   | -115,149                  | -117,644  | 13,846                  | 12,180    | 1,171                       | -577      |
| Costs associated with state CIN II/III      | 2,767.34   | 2,213.87                | 3,320.81   | -116,003                  | -116,791  | 13,277                  | 12,750    | 574                         | 21        |
| Costs associated with state Cervical Cancer | 118,506.78 | 94,805.43               | 142,208.14 | -93,951                   | -138,842  | 27,831                  | -1,805    | 15,865                      | -15,270   |
| Costs associated with state Genital Warts   | 1,095.42   | 547.71                  | 1,643.13   | -122,337                  | -110,456  | 13,595                  | 12,432    | 238                         | 357       |

  

| Drug and Equipment Costs (ZAR) | Value    | 95% Confidence Interval |          | Bivalent vs. Quadrivalent |           | Bivalent vs. Nonavalent |           | Quadrivalent vs. Nonavalent |           |
|--------------------------------|----------|-------------------------|----------|---------------------------|-----------|-------------------------|-----------|-----------------------------|-----------|
|                                |          |                         |          | Lower CI                  | Higher CI | Lower CI                | Higher CI | Lower CI                    | Higher CI |
| Bivalent vaccine cost          | 139.82   | 133.58                  | 146.07   | -116,776                  | -116,017  | 13,055                  | 12,972    | 297                         | 297       |
| Quadrivalent vaccine cost      | 174.78   | 166.97                  | 182.58   | -115,922                  | -116,871  | 13,013                  | 13,013    | 344                         | 251       |
| Nonavalent vaccine cost        | 3,923.75 | 3,748.51                | 4,098.98 | -116,397                  | -116,397  | 11,852                  | 14,174    | -750                        | 1,344     |
| Bivalent booster shot cost     | 70.59    | 67.33                   | 73.85    | -117,470                  | -115,323  | 13,130                  | 12,896    | 297                         | 297       |
| Quadrivalent booster shot cost | 88.24    | 84.16                   | 92.31    | -115,054                  | -117,739  | 13,013                  | 13,013    | 429                         | 165       |
| Nonavalent booster shot cost   | 1,980.92 | 1,889.49                | 2,072.35 | -116,397                  | -116,397  | 9,730                   | 16,297    | -2,664                      | 3,258     |
| PAP smear cost                 | 623.61   | 498.88                  | 748.33   | -116,417                  | -116,377  | 13,000                  | 13,027    | 283                         | 312       |

  

| Other Parameters                             | Value | 95% Confidence Interval |      | Bivalent vs. Quadrivalent |           | Bivalent vs. Nonavalent |           | Quadrivalent vs. Nonavalent |           |
|----------------------------------------------|-------|-------------------------|------|---------------------------|-----------|-------------------------|-----------|-----------------------------|-----------|
|                                              |       |                         |      | Lower CI                  | Higher CI | Lower CI                | Higher CI | Lower CI                    | Higher CI |
| Discount rate of utilities                   | 0.03  | 0.01                    | 0.05 | -44,655                   | -294,011  | 5,551                   | 28,229    | 125                         | 654       |
| Discount rate of costs                       | 0.03  | 0.01                    | 0.05 | -290,000                  | -50,349   | -5,112                  | 20,907    | -33,105                     | 13,906    |
| Long-run inflation rate (South Africa)       | 0.05  | 0.04                    | 0.05 | -93,894                   | -144,648  | 15,672                  | 9,773     | 4,906                       | -5,400    |
| Hazard ratio for CIN I,II, and III mortality | 1.2   | 1.1                     | 1.3  | -122,881                  | -110,525  | 12,734                  | 13,271    | -404                        | 947       |
| Vaccine coverage                             | 0.90  | 0.85                    | 0.95 | -115,053                  | -117,844  | 16,528                  | 9,521     | 3,027                       | -2,420    |
| Age of sexual debut                          | 18.5  | 17.1                    | 20.3 | -114,272                  | -120,470  | 11,877                  | 15,475    | -452                        | 1,960     |
| Duration of vaccine efficacy                 | 20    | 10                      | 30   | -121,430                  | -114,730  | 72,386                  | -6,641    | 53,342                      | -17,262   |

**Table e5** Univariate sensitivity analysis

Costs are displayed in 2019 R. CI: confidence interval; CIN: cervical interstitial neoplasia; HR: high-risk; ICER: incremental cost-effectiveness ratio; LR: low-risk; PAP: Papanicolaou; QALY: quality-adjusted life year; R: South African Rand.

|                                                    | Value      | Alpha    | Beta     | Distribution |
|----------------------------------------------------|------------|----------|----------|--------------|
| <b>TRANSITION PROBABILITIES</b>                    |            |          |          |              |
| from Healthy to HR Infection                       | 0.1320     | 62.00    | 407.57   | Dirichlet    |
| from Healthy to LR Infection                       | 0.0650     | 34.74    | 499.73   | Dirichlet    |
| from HR Infection to CIN I (9-34 years)            | 0.0878     | 8.47     | 88.05    | Dirichlet    |
| from HR Infection to CIN I (35-70 years)           | 0.0824     | 2.17     | 24.11    | Dirichlet    |
| from HR Infection to CIN II/III (9-34 years)       | 0.0070     | 1.94     | 276.32   | Dirichlet    |
| from HR Infection to CIN II/III (35-70 years)      | 0.0287     | 1.84     | 62.20    | Dirichlet    |
| from HR Infection to Healthy                       | 0.3900     | 8.89     | 13.90    | Dirichlet    |
| from LR Infection to Genital Warts                 | 0.0297     | 0.95     | 31.00    | Dirichlet    |
| from LR Infection to Healthy                       | 0.4100     | 9.51     | 13.68    | Dirichlet    |
| from CIN I to CIN II/III (9-34 years)              | 0.0567     | 1.77     | 29.40    | Dirichlet    |
| from CIN I to CIN II/III (35-70 years)             | 0.2321     | 1.39     | 4.61     | Dirichlet    |
| from CIN I to Healthy                              | 0.4982     | 0.98     | 0.99     | Dirichlet    |
| from CIN II/III to Cervical Cancer                 | 0.0480     | 6.03     | 119.55   | Dirichlet    |
| from CIN II/III to Healthy                         | 0.0370     | 3.26     | 84.82    | Dirichlet    |
| from Cervical Cancer to Healthy                    | 0.1560     | 21.22    | 114.79   | Dirichlet    |
| from Cervical Cancer to Dead                       | 0.1060     | 22.67    | 191.21   | Dirichlet    |
| from Genital Warts to Healthy                      | 0.7140     | 10.89    | 4.36     | Dirichlet    |
| <b>UTILITIES (in QALY)</b>                         |            |          |          |              |
| associated with state HR Infection                 | 1.00       | 384.16   | 0.0026   | Beta         |
| associated with state LR Infection                 | 1.00       | 384.16   | 0.0026   | Beta         |
| associated with state CIN I Cancer                 | 0.91       | 1536.64  | 0.0006   | Beta         |
| associated with state CIN II/III Cancer            | 0.87       | 1536.64  | 0.0006   | Beta         |
| associated with state Cervical Cancer              | 0.56       | 166.74   | 0.0034   | Beta         |
| associated with state Genital Warts                | 0.82       | 7207.83  | 0.0001   | Beta         |
| <b>DIRECT MEDICAL COSTS (in R)</b>                 |            |          |          |              |
| associated with state CIN I Cancer                 | 1,385.66   | 96.04    | 14.43    | Gamma        |
| associated with state CIN II/III Cancer            | 2,767.34   | 96.04    | 28.81    | Gamma        |
| associated with state Cervical Cancer              | 118,506.78 | 96.04    | 1,233.93 | Gamma        |
| associated with state Genital Warts                | 1,095.42   | 15.37    | 71.29    | Gamma        |
| <b>VACCINE AND EQUIPMENT COST (in R)</b>           |            |          |          |              |
| Bivalent vaccine (Cervarix <sup>®</sup> )          | 139.82     | 1,926.06 | 0.07     | Gamma        |
| Quadrivalent vaccine (Gardasil <sup>®</sup> )      | 174.78     | 1,926.06 | 0.09     | Gamma        |
| Nonavalent vaccine (Gardasil9 <sup>®</sup> )       | 3,923.75   | 1,926.06 | 2.04     | Gamma        |
| Bivalent booster shot (Cervarix <sup>®</sup> )     | 70.59      | 1,803.42 | 0.04     | Gamma        |
| Quadrivalent booster shot (Gardasil <sup>®</sup> ) | 88.24      | 1,803.42 | 0.05     | Gamma        |
| Nonavalent booster shot (Gardasil9 <sup>®</sup> )  | 1,980.92   | 1,803.42 | 1.10     | Gamma        |
| PAP smear                                          | 623.61     | 96.04    | 6.49     | Gamma        |

**Table e6** Input variables' alpha and beta parameters

Costs are displayed in 2019 R. CIN: cervical interstitial neoplasia; HR: high-risk; LR: low-risk; PAP: Papanicolaou; QALY: quality-adjusted life year; R: South African Rand.

|                                                         | Bivalent vs quadrivalent |          |         | Bivalent vs nonavalent |         |         | Quadrivalent vs nonavalent |         |         |
|---------------------------------------------------------|--------------------------|----------|---------|------------------------|---------|---------|----------------------------|---------|---------|
|                                                         | ICER                     | 95% CI   |         | ICER                   | 95% CI  |         | ICER                       | 95% CI  |         |
| Base case                                               | -117,160                 | -145,967 | -92,564 | 12,031                 | -2,764  | 26,563  | -547                       | -15,540 | 14,165  |
| Transition probabilities modeled with beta distribution | -94,076                  | -250,780 | 46,261  | 32,779                 | -36,248 | 135,120 | 19,858                     | -44,312 | 119,810 |
| Costs modelled with log-normal distribution             | -117,848                 | -144,769 | -94,178 | 13,389                 | -1,062  | 27,941  | 598                        | -13,319 | 15,223  |

**Table e7** ICER results under different parameter distributions

Costs are displayed in 2019 R. CI: confidence interval; ICER: incremental cost-effectiveness ratio; R: South African Rand.



| Vaccination Strategy | Total QALYs | Total Costs<br>(R) | Compared to No Vaccine |         |          | Compared to Bivalent Vaccine |         |            |
|----------------------|-------------|--------------------|------------------------|---------|----------|------------------------------|---------|------------|
|                      |             |                    | Δ QALYs                | Δ Costs | ICER     | Δ QALYs                      | Δ Costs | ICER       |
| No Vaccine           | 25.32       | 62,703             |                        |         |          |                              |         |            |
| Bivalent             | 25.40       | 37,250             | 0.08                   | -25,453 | -307,663 |                              |         |            |
| Quadrivalent         | 25.40       | 38,840             | 0.08                   | -23,863 | -289,906 | 0.00                         | 1,590   | -3,801,152 |
| Nonavalent           | 25.48       | 23,852             | 0.16                   | -38,851 | -239,974 | 0.08                         | -13,398 | -169,239   |

**Table e8** Cost-effectiveness results for the alternative Markov model structure

The Table shows the results for the alternative Markov model structure presented Supplement, Figure e1. Similar to the base case model, the alternative model also considers vaccination boosters. Input parameters can be found in Table 1. Costs are displayed in 2019 R. ICER: incremental cost-effectiveness ratio; QALY: quality-adjusted life year; R: South African Rand.

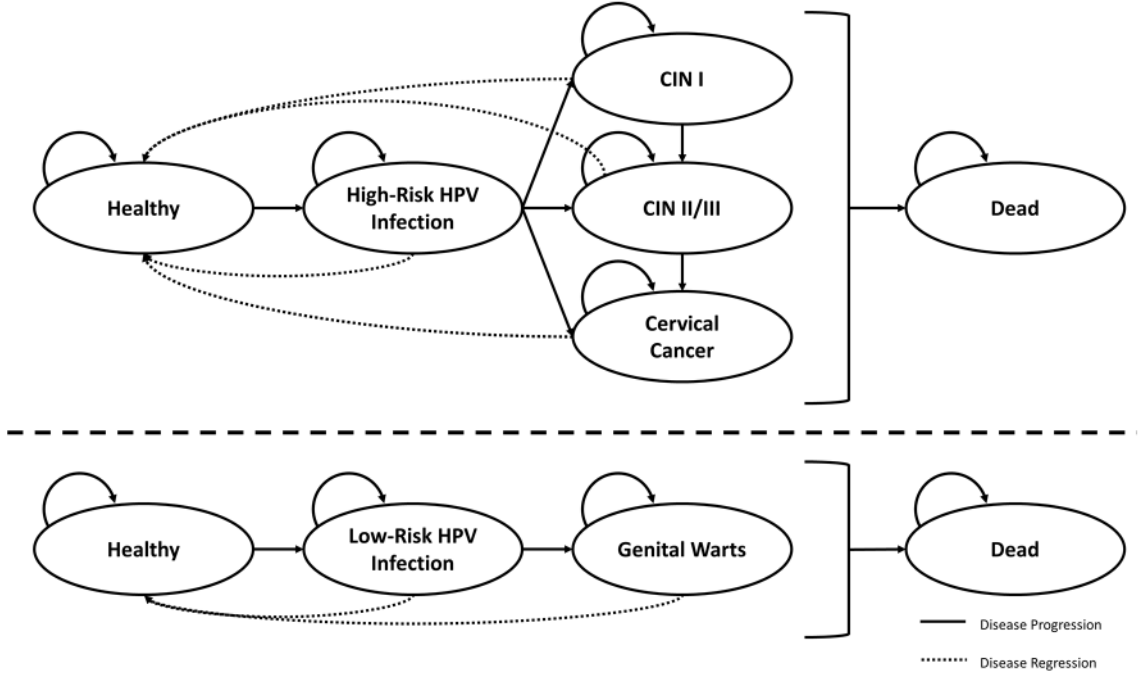

Figure e1 Alternative Markov model structure

The graph illustrates the alternative Markov model that remodels cervical cancer and genital warts disease progression to evaluate the cost-effectiveness of bivalent, quadrivalent, and nonavalent HPV vaccination. This Markov model entails two different models to account for simultaneous low- and high-risk HPV infections. CIN: cervical interstitial neoplasia; HPV: human papillomavirus.

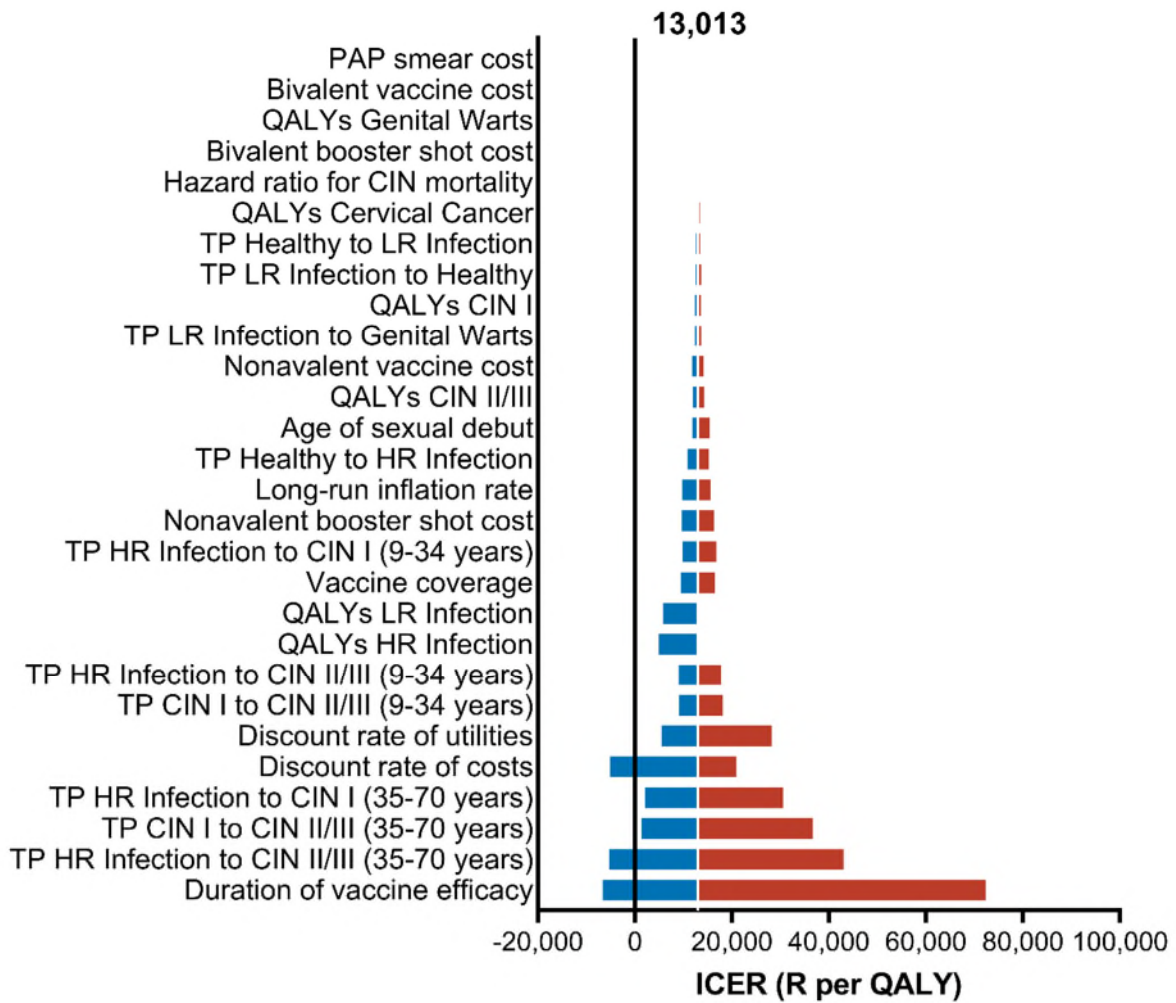

**Figure e2** Tornado plot for nonavalent compared to bivalent vaccination

The graph illustrates results of the univariate sensitivity analysis in a tornado plot. ICER: incremental cost-effectiveness ratio; QALY: quality-adjusted life year; R: South African Rand.

## References

1. World Health Organization (2002) Guidelines for estimating costs of introducing new vaccines into the national immunization system. World Health Organization.
2. Moodley I, Tathiah N, Sartorius B (2016) The costs of delivering human papillomavirus vaccination to Grade 4 learners in KwaZulu-Natal, South Africa. *South Afr Med J Suid-Afr Tydskr Vir Geneeskd* 106:60
3. Botwright S, Holroyd T, Nanda S, Bloem P, Griffiths UK, Sidibe A, Hutubessy RCW (2017) Experiences of operational costs of HPV vaccine delivery strategies in Gavi-supported demonstration projects. *PloS One* 12:e0182663
4. Mbulawa ZZA, van Schalkwyk C, Hu N-C, et al (2018) High human papillomavirus (HPV) prevalence in South African adolescents and young women encourages expanded HPV vaccination campaigns. *PloS One* 13:e0190166
5. Garland SM, Hernandez-Avila M, Wheeler CM, et al (2007) Quadrivalent vaccine against human papillomavirus to prevent anogenital diseases. *N Engl J Med* 356:1928–1943
6. Harper DM, Franco EL, Wheeler CM, et al (2006) Sustained efficacy up to 4.5 years of a bivalent L1 virus-like particle vaccine against human papillomavirus types 16 and 18: follow-up from a randomised control trial. *Lancet Lond Engl* 367:1247–1255
7. Muñoz N, Kjaer SK, Sigurdsson K, et al (2010) Impact of human papillomavirus (HPV)-6/11/16/18 vaccine on all HPV-associated genital diseases in young women. *J Natl Cancer Inst* 102:325–339
8. Paavonen J, Naud P, Salmerón J, et al (2009) Efficacy of human papillomavirus (HPV)-16/18 AS04-adjuvanted vaccine against cervical infection and precancer caused by oncogenic HPV types (PATRICIA): final analysis of a double-blind, randomised study in young women. *Lancet Lond Engl* 374:301–314
9. Brown DR, Kjaer SK, Sigurdsson K, et al (2009) The impact of quadrivalent human papillomavirus (HPV; types 6, 11, 16, and 18) L1 virus-like particle vaccine on infection and disease due to oncogenic nonvaccine HPV types in generally HPV-naive women aged 16-26 years. *J Infect Dis* 199:926–935
10. Wheeler CM, Castellsagué X, Garland SM, et al (2012) Cross-protective efficacy of HPV-16/18 AS04-adjuvanted vaccine against cervical infection and precancer caused by non-vaccine oncogenic HPV types: 4-year end-of-study analysis of the randomised, double-blind PATRICIA trial. *Lancet Oncol* 13:100–110
11. Jenkins D (2008) A review of cross-protection against oncogenic HPV by an HPV-16/18 AS04-adjuvanted cervical cancer vaccine: importance of virological and clinical endpoints and implications for mass vaccination in cervical cancer prevention. *Gynecol Oncol* 110:S18-25
12. Demarteau N, Tang C-H, Chen H-C, Chen C-J, Van Krieking G (2012) Cost-effectiveness analysis of the bivalent compared with the quadrivalent human papillomavirus vaccines in Taiwan. *Value Health J Int Soc Pharmacoeconomics Outcomes Res* 15:622–631

13. Meyer-Rath G, van Rensburg C, Larson B, Jamieson L, Rosen S (2017) Revealed willingness-to-pay versus standard cost-effectiveness thresholds: Evidence from the South African HIV Investment Case. *PLoS ONE* 12:e0186496
14. Hutubessy R, Chisholm D, Edejer TT-T (2003) Generalized cost-effectiveness analysis for national-level priority-setting in the health sector. *Cost Eff Resour Alloc CE* 1:8
15. Woods B, Reville P, Sculpher M, Claxton K (2016) Country-Level Cost-Effectiveness Thresholds: Initial Estimates and the Need for Further Research. *Value Health J Int Soc Pharmacoeconomics Outcomes Res* 19:929–935
